# Supplementary material for: The opposite prognostic effect of NDUFS1 and NDUFS8 in lung cancer reflects the oncojanus role of mitochondrial complex I
Source: PubMed Central journal article supplement (PMC4981865; doi:10.1038/srep31357), 2016-08-12

# **The opposite prognostic effect of NDUFS1 and NDUFS8 in lung cancer reflects the oncojanus role of mitochondrial complex I**

Running title: Prognostic oncojanus roles of NDUFS1 and NDUFS8

Chia-Yi Su<sup>1</sup>, Yu-Chan Chang<sup>1</sup>, Chih-Jen Yang<sup>2</sup>, Ming-Shyan Huang<sup>2\*</sup>, Michael Hsiao<sup>1\*</sup>

<sup>1</sup>Genomics Research Center, Academia Sinica, Taipei, Taiwan

<sup>2</sup>Department of Internal Medicine, Kaohsiung Medical University Hospital, Kaohsiung Medical University, Kaohsiung, Taiwan

\*Correspondence to Dr. Michael Hsiao, Genomics Research Center, Academia Sinica, Taipei, Taiwan. Tel: +886-2-2787-1243; Fax: +886-2-2789-9931; E-mail:

[mhsiao@gate.sinica.edu.tw](mailto:mhsiao@gate.sinica.edu.tw)

or to Dr. Ming-Shyan Huang, Department of Internal Medicine, Kaohsiung Medical University Hospital, Kaohsiung Medical University, Kaohsiung, Taiwan, E-mail:

[shyang@kmu.edu.tw](mailto:shyang@kmu.edu.tw)

**Supplementary table 1.** Clinicopathological and demographic characteristics of 101

non-small lung cancer patients

| Clinicopathological feature | N (%)     |
|-----------------------------|-----------|
| All patients                | 101 (100) |
| Age                         |           |
| <65 y                       | 55 (54)   |
| $\geq$ 65 y                 | 46 (46)   |
| Gender                      |           |
| Male                        | 57 (56)   |
| Female                      | 44 (44)   |
| Smoking                     |           |
| Smoker                      | 38 (38)   |
| Non-smoker                  | 63 (62)   |
| Histology subtype           |           |
| Adenocarcinoma              | 62 (61)   |
| Squamous cell carcinoma     | 32 (32)   |
| Large cell carcinoma        | 7 (7)     |
| T stage                     |           |
| T1                          | 20 (20)   |
| T2                          | 49 (48)   |
| T3                          | 6 (6)     |
| T4                          | 26 (26)   |
| N stage                     |           |
| N0                          | 35 (35)   |
| N1                          | 19 (19)   |
| N2                          | 14 (14)   |
| N3                          | 33 (32)   |
| M stage                     |           |
| M0                          | 74 (73)   |
| M1                          | 27 (27)   |
| Stage                       |           |
| I                           | 30 (30)   |
| II                          | 11 (11)   |
| III                         | 31 (30)   |
| IV                          | 29 (29)   |
| Recurrence                  |           |
| No                          | 25 (25)   |
| Yes                         | 76 (75)   |

## Supplementary Table 2

The correlations between IHC expression levels of NDUFS1, NDUFV1, NDUFV2, NDUFS2, NDUFS3, NDUFS7, and NDUFS8 analyzed by Spearman's rank correlation analysis

|        | NDUFS1 | NDUFV1  | NDUFV2  | NDUFS2  | NDUFS3  | NDUFS7  | NDUFS8 |
|--------|--------|---------|---------|---------|---------|---------|--------|
| NDUFS1 | 1      |         |         |         |         |         |        |
| NDUFV1 | 0.053  | 1       |         |         |         |         |        |
| NDUFV2 | 0.255* | 0.443** | 1       |         |         |         |        |
| NDUFS2 | 0.136  | 0.364** | 0.361** | 1       |         |         |        |
| NDUFS3 | 0.164  | 0.292** | 0.455** | 0.494** | 1       |         |        |
| NDUFS7 | 0.212* | 0.404** | 0.364** | 0.404*  | 0.252*  | 1       |        |
| NDUFS8 | -0.099 | 0.364** | 0.439** | 0.277** | 0.425** | 0.404** | 1      |

\*. Correlation is significant at the 0.05 level (2-tailed).

\*\*. Correlation is significant at the 0.01 level (2-tailed).

### Supplementary Table 3

The correlations between RNA expression levels of NDUFS1, NDUFV1, NDUFV2,

NDUFS2, NDUFS3, NDUFS7, and NDUFS8 analyzed by Spearman's rank correlation

analysis

|        | NDUFS1   | NDUFV1  | NDUFV2  | NDUFS2  | NDUFS3  | NDUFS7  | NDUFS8 |
|--------|----------|---------|---------|---------|---------|---------|--------|
| NDUFS1 | 1        |         |         |         |         |         |        |
| NDUFV1 | -0.106** | 1       |         |         |         |         |        |
| NDUFV2 | -0.313** | 0.243** | 1       |         |         |         |        |
| NDUFS2 | -0.003   | 0.220** | 0.116** | 1       |         |         |        |
| NDUFS3 | -0.153** | 0.427** | 0.313** | 0.171** | 1       |         |        |
| NDUFS7 | -0.097** | 0.355** | 0.270** | 0.074*  | 0.395** | 1       |        |
| NDUFS8 | -0.231** | 0.518** | 0.328** | 0.124** | 0.470** | 0.553** | 1      |

\*\* . Correlation is significant at the 0.01 level (2-tailed).

### Supplementary Table 4

Correlations of clinicopathological features of lung cancer patients with NDUFS1 and

NDUFS8 IHC expression

| Clinicopathological feature | n  | NDUFS1 expression, n (%) |             | <i>P</i> | NDUFS8 expression, n (%) |             | <i>P</i> |
|-----------------------------|----|--------------------------|-------------|----------|--------------------------|-------------|----------|
|                             |    | Low (n=54)               | High (n=47) |          | Low (N=42)               | High (N=59) |          |
| <b>Age</b>                  |    |                          |             |          |                          |             |          |
| <65 y                       | 55 | 24 (43.6)                | 31 (56.4)   | 0.030    | 22 (40.0)                | 33 (60.0)   | 0.724    |
| ≥65 y                       | 46 | 30 (65.2)                | 16 (34.8)   |          | 20 (43.5)                | 26 (56.5)   |          |
| <b>Gender</b>               |    |                          |             |          |                          |             |          |
| Male                        | 57 | 32 (56.1)                | 25 (43.9)   | 0.540    | 26 (45.6)                | 31 (54.4)   | 0.350    |
| Female                      | 44 | 22 (50.0)                | 22 (50.0)   |          | 16 (36.4)                | 28 (63.6)   |          |
| <b>Smoking</b>              |    |                          |             |          |                          |             |          |
| Smoker                      | 38 | 22 (57.9)                | 16 (42.1)   | 0.488    | 14 (36.8)                | 24 (63.2)   | 0.453    |
| Non-smoker                  | 63 | 32 (50.8)                | 31 (49.2)   |          | 28 (44.4)                | 35 (55.6)   |          |
| <b>Histology</b>            |    |                          |             |          |                          |             |          |
| Adenocarcinoma              | 62 | 29 (46.8)                | 33 (53.2)   | 0.215    | 21 (33.9)                | 41 (66.1)   | 0.046    |
| Squamous cell carcinoma     | 32 | 20 (62.5)                | 12 (37.5)   |          | 19 (59.4)                | 13 (40.6)   |          |
| Large cell carcinoma        | 7  | 5 (71.4)                 | 2 (28.6)    |          | 2 (28.6)                 | 5 (71.4)    |          |
| <b>T stage</b>              |    |                          |             |          |                          |             |          |
| T1+T2                       | 69 | 29 (42.0)                | 40 (58.0)   | 0.001    | 27 (39.1)                | 42 (60.9)   | 0.463    |
| T3+T4                       | 32 | 25 (78.1)                | 7 (21.9)    |          | 15 (46.9)                | 17 (53.1)   |          |
| <b>N stage</b>              |    |                          |             |          |                          |             |          |
| N0                          | 35 | 15 (42.9)                | 20 (57.1)   | 0.120    | 18 (51.4)                | 17 (48.6)   | 0.144    |
| N1-N3                       | 66 | 39 (59.1)                | 27 (40.9)   |          | 24 (36.4)                | 42 (63.6)   |          |
| <b>M stage</b>              |    |                          |             |          |                          |             |          |
| M0                          | 74 | 35 (47.3)                | 39 (52.7)   | 0.040    | 34 (45.9)                | 40 (54.1)   | 0.141    |
| M1                          | 27 | 19 (70.4)                | 8 (29.6)    |          | 8 (29.6)                 | 19 (70.4)   |          |
| <b>Pathological stage</b>   |    |                          |             |          |                          |             |          |
| I + II                      | 41 | 16 (39.0)                | 25 (61.0)   | 0.016    | 19 (46.3)                | 22 (53.7)   | 0.423    |
| III + IV                    | 60 | 38 (63.3)                | 22 (36.7)   |          | 23 (38.3)                | 37 (61.7)   |          |

## **Supplementary figure legends**

**Supplementary figure 1.** Representative images showing the intensity of the immunostaining of NDUFS1, NDUFS2, NDUFS3, NDUFS7, NDUFS8, NDUFV1, and NDUFV2 in the non-small lung cancer tissue microarrays. The images were taken at a magnification of 200×. Scale bars represent 100 μm.

**Supplementary Figure 1**

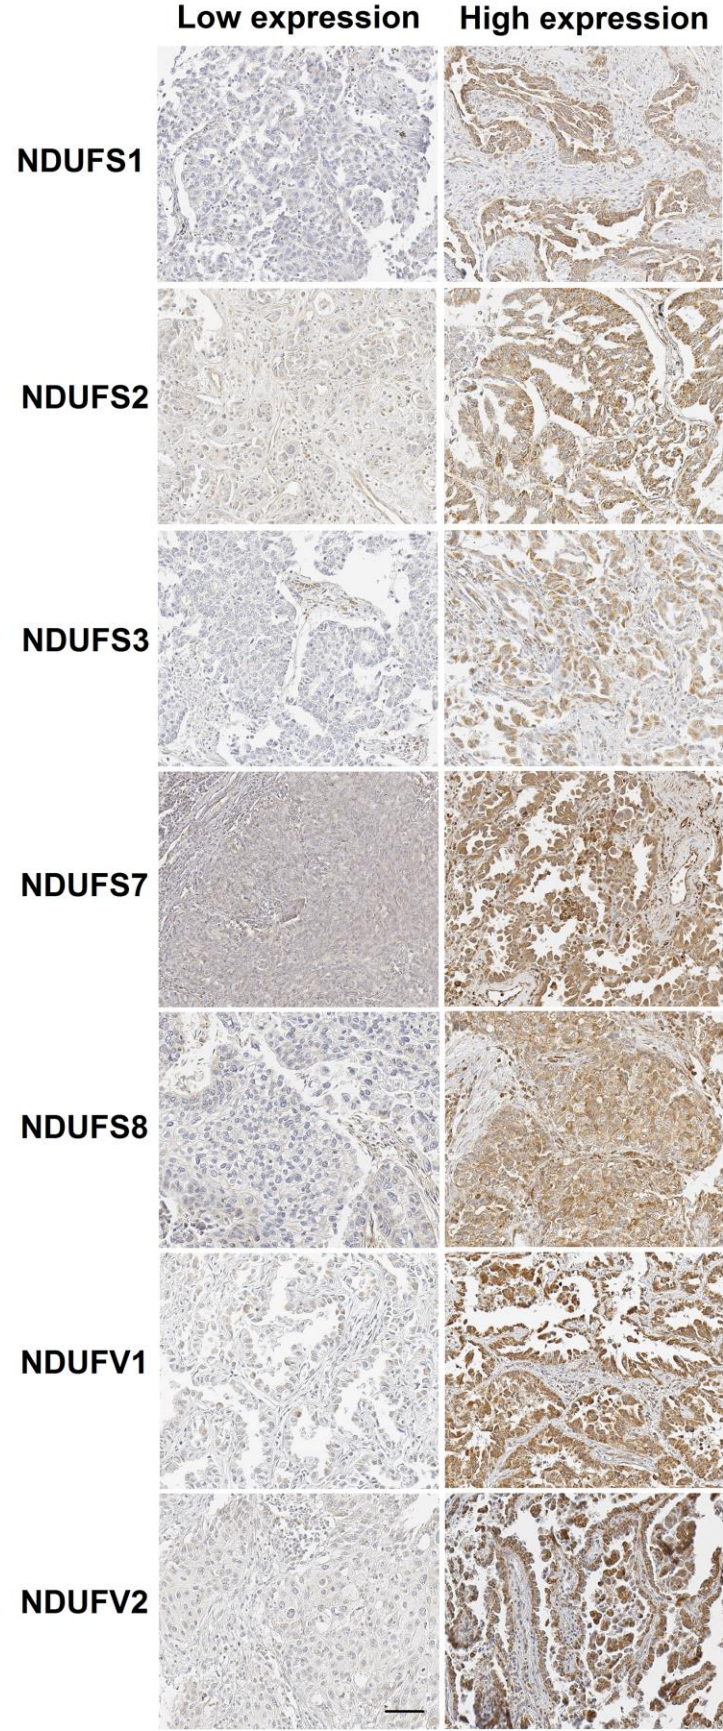

Supplement: srep31357-s1.pdf [file srep31357-s1.pdf]
